# Supplementary material
Source: PubMed Central journal article supplement (PMC3809388)
Supplement: Supp_Table1.pdf [file Supp_Table1.pdf]

SUPPLEMENTARY TABLE S1. HIV VACCINE TRIALS NETWORK 505 REDESIGN OPTIONS IN 2010, FOLLOWING THE iPrEx STUDY RESULTS SHOWING PARTIAL EFFICACY OF TDF-FTC AS ORAL PREEXPOSURE PROPHYLAXIS<sup>2</sup>

|                                                               | <b>Option 0:</b><br><i>Continue current design with primary endpoint setpoint viral load, monitor PrEP use</i> | <b>Expanded Option 0:</b> <i>Add HIV acquisition as coprimary endpoint, monitor PrEP use</i> | <b>Option A:</b><br><i>Add PrEP and Vaccine + PrEP arms</i>                          |
|---------------------------------------------------------------|----------------------------------------------------------------------------------------------------------------|----------------------------------------------------------------------------------------------|--------------------------------------------------------------------------------------|
| Scientific questions addressed                                | Vaccine effect on setpoint viral load                                                                          | Vaccine effect on HIV acquisition and setpoint viral load                                    | Vaccine, PrEP, and Vaccine + PrEP effects on HIV acquisition and setpoint viral load |
| Total sample size (# of HIV infections in 24 month follow-up) | <i>n</i> = 1,350 (50–60 infections)                                                                            | <i>n</i> = 3200 (132 infections)                                                             | <i>n</i> = 3900 (132 infections)                                                     |
| PrEP assumptions                                              | Uptake = 20%<br>Efficacy = 44%                                                                                 | Uptake = 20%<br>Efficacy = 44%                                                               | Uptake = 55%<br>Efficacy = 44%                                                       |
| Power for VE over 24 month follow-up                          | 46% to detect VE = 40%                                                                                         | 80% to detect VE = 40%                                                                       | 80% to detect VE = 40%                                                               |
| Increase in accrual period, relative to current design        | None                                                                                                           | 17 months                                                                                    | 20 months                                                                            |
| Increase in total trial duration, relative to current design  | 1–2 months                                                                                                     | 12 months                                                                                    | 15 months                                                                            |

PrEP, preexposure prophylaxis; VE, vaccine efficacy.
